# Supplementary material
Source: PubMed Central journal article supplement (PMC1899444)

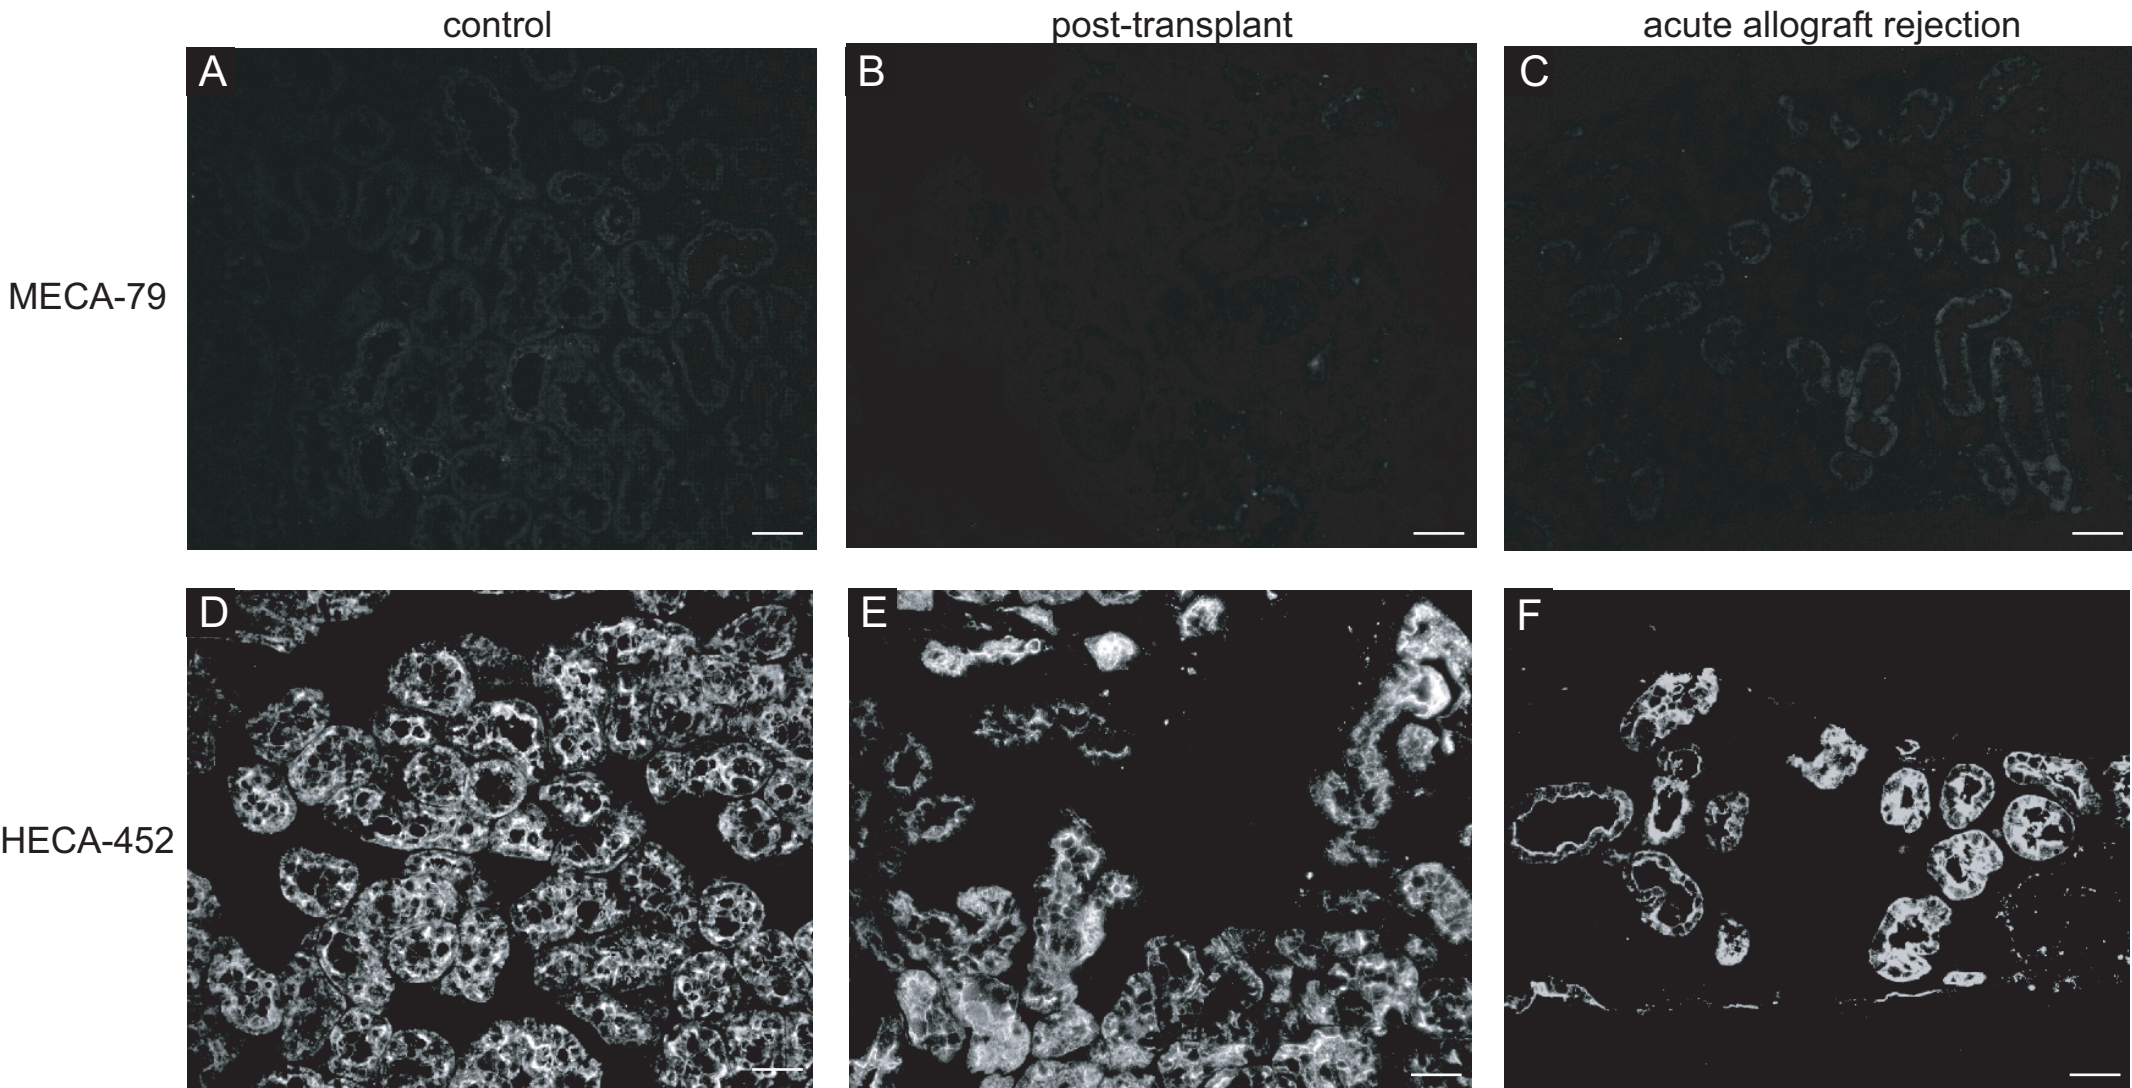

Supplementary Fig. 1

Supplement: amjpathol_170_6_1865__1.pdf [file amjpathol_170_6_1865__1.pdf]
